# Supplementary material
Source: PubMed Central journal article supplement (PMC6463710)
Supplement: supp_RA119.007516_143073_1_supp_286893_pmy7j9.pdf [file supp_RA119.007516_143073_1_supp_286893_pmy7j9.pdf]

Folding/unfolding kinetics of G-quadruplexes upstream of the P1 promoter of the human  
*BCL-2* oncogene

**Yuanlei Cheng,<sup>1</sup> Qingnan Tang,<sup>2</sup> Yutong Li,<sup>1</sup> Yashuo Zhang,<sup>1</sup> Chuyuan Zhao,<sup>2</sup> Jie**

**Yan,<sup>2,3</sup> and Huijuan You<sup>1</sup> \***

<sup>1</sup>School of Pharmacy, Tongji Medical College, Huazhong University of Science and  
Technology, 430030, Wuhan, China.

<sup>2</sup>Department of Physics, National University of Singapore, 117542, Singapore.

<sup>3</sup>Mechanobiology Institute, National University of Singapore, 117411, Singapore.

### **Supporting Information**

Table S1

Figure S1

| Name             | Sequence (5' to 3')                                                                             |
|------------------|-------------------------------------------------------------------------------------------------|
| Pu39             | A <b>GGGG</b> C <b>GGG</b> CGCG <b>GGG</b> AGGA <b>AGGGGG</b> C <b>GGG</b> AGC <b>GGGG</b> GCTG |
| <b>Bcl2-2345</b> | A <b>GGGG</b> CGCG <b>GGG</b> AGGA <b>AGGGGG</b> C <b>GGG</b> A                                 |
| Bcl2-1234        | A <b>GGGG</b> C <b>GGG</b> CGCG <b>GGG</b> AGGA <b>AGGGGG</b> C                                 |
| Bcl2-3456        | CGC <b>GGG</b> AGGA <b>AGGGGG</b> C <b>GGG</b> AGC <b>GGGG</b> GCTG                             |
| <b>Bcl2-1245</b> | A <b>GGGG</b> C <b>GGG</b> CGCTTTAGGAAA <b>AGGG</b> C <b>GGG</b> A                              |
| -----            |                                                                                                 |
| Bcl2-1345        | A <b>GGGG</b> CTTTCGC <b>GGG</b> AGGA <b>AGGGGG</b> C <b>GGG</b> AGC                            |
| Bcl2-1235        | A <b>GGGG</b> C <b>GGG</b> CGCG <b>GGG</b> AGGAATTTTTC <b>GGG</b> AGC                           |
| Bcl2-2346        | C <b>GGG</b> CGCG <b>GGG</b> AGGA <b>AGGGGG</b> CTTTAGC <b>GGGG</b> GCTG                        |
| Bcl2-2356        | C <b>GGG</b> CGCG <b>GGG</b> AGGAATTTTTC <b>GGG</b> AGC <b>GGGG</b> GCTG                        |
| Bcl2-2456        | C <b>GGG</b> CGCTTTAGGA <b>AGGGGG</b> C <b>GGG</b> AGC <b>GGGG</b> GCTG                         |
| Bcl2-1236        | A <b>GGGG</b> C <b>GGG</b> CGCG <b>GGG</b> AGGAATTTTCTTTAGC <b>GGGG</b> GCTG                    |
| Bcl2-1246        | A <b>GGGG</b> C <b>GGG</b> CGCTTTAGGA <b>AGGGGG</b> CTTTAGC <b>GGGG</b> GCTG                    |
| Bcl2-1256        | A <b>GGGG</b> C <b>GGG</b> CGCTTTAGGAATTTTTC <b>GGG</b> AGC <b>GGGG</b> GCTG                    |
| Bcl2-1346        | A <b>GGGG</b> CTTTCGC <b>GGG</b> AGGA <b>AGGGGG</b> CTTTAGC <b>GGGG</b> GCTG                    |
| Bcl2-1356        | A <b>GGGG</b> CTTTCGC <b>GGG</b> AGGAATTTTTC <b>GGG</b> AGC <b>GGGG</b> GCTG                    |
| Bcl2-1456        | A <b>GGGG</b> CTTTCGCCTTTAGGA <b>AGGGGG</b> C <b>GGG</b> AGC <b>GGGG</b> GCTG                   |

**Table S1.** 15 truncated mutants with all the possible combinations of four G-tracts in the Pu39 sequence. The G-tracts are shown in bold. The sequences are listed based on the length of oligonucleotides and the length smaller than 30-nt are listed above the dotted line.

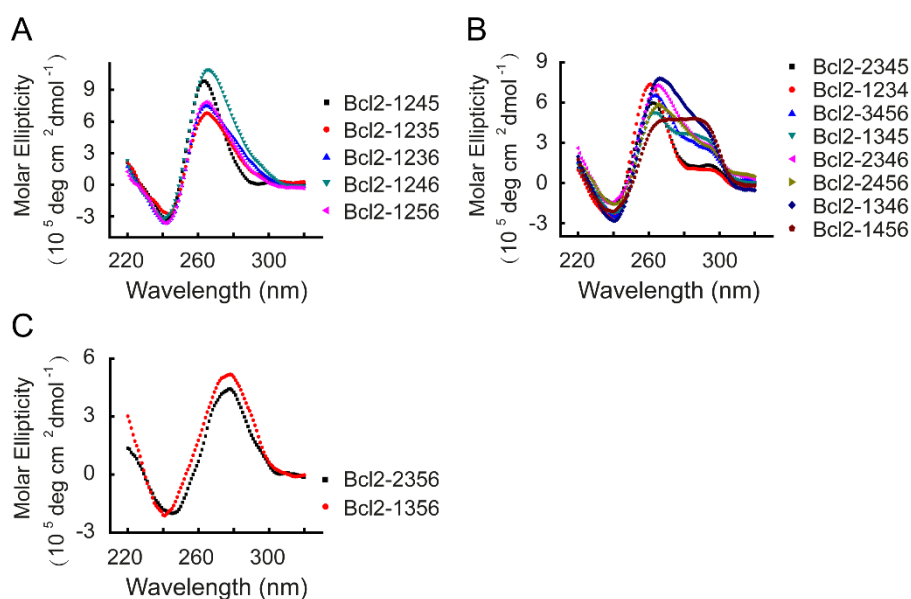

**Figure S1.** The CD spectra of the truncated mutants measured in 100 mM KCl at room temperature. (A) CD spectra of five sequences with a single positive peak at ~260 nm indicate the formation of parallel-stranded G4 structures. (B) CD spectra of eight sequences with a large positive peak at ~260 nm and a small positive peak at ~290 nm indicate the formation of a mixed parallel/antiparallel-stranded G4 structures. (C) CD spectra of the Bcl2-2356 and Bcl2-1356 sequences.
